# Supplementary material for: New Mitochondrial and Nuclear Evidences Support Recent Demographic Expansion and an Atypical Phylogeographic Pattern in the Spittlebug Philaenus spumarius (Hemiptera, Aphrophoridae)
Source: PubMed Central journal article supplement (PMC4043774; doi:10.1371/journal.pone.0098375), 2014-06-03
Supplement: pone.0098375.s006.pdf [file pone.0098375.s006.pdf]

**Table S1.** Analysed samples of *Philaenus spumarius* with description of the sampling locations and indication of the corresponding mtDNA Cytochrome *c* oxidase I (COI), Cytochrome *c* oxidase II (COII), Cytochrome *b* haplotype/code and Elongation Factor-1 $\alpha$  code (EF-1 $\alpha$ ).

| Location (Collector)                                               | COI Haplotype/Code | COII Haplotype/Code | Cyt <i>b</i> Haplotype/Code | EF-1 $\alpha$ Code | GPS Coordinates             |
|--------------------------------------------------------------------|--------------------|---------------------|-----------------------------|--------------------|-----------------------------|
| <b>Portugal</b>                                                    |                    |                     |                             |                    |                             |
| Quinta da Ranca, Vinhais, Trás-os-Montes (Seabra)                  | H27/Ranca_1        | H7/Ranca_1          | H9/Ranca_1                  |                    | 41°48'48.80"N; 6°59'44.51"W |
| Viana do Castelo, Minho (Seabra)                                   | H30                |                     |                             |                    | 41°42'40.10"N; 8°51'20.95"W |
| Parque Nacional Peneda Gerês, Minho (Rodrigues, Silva, Marabuto)   | H29                |                     |                             |                    | 41°43'44.34"N; 8°9'46.46"W  |
| São Jacinto, Aveiro (Seabra)                                       | H29                |                     |                             |                    | 40°40'36.19"N; 8°43'13.53"W |
| São Jacinto, Aveiro (Marabuto)                                     | H29/S.Jacinto_3    | H3/S.Jacinto_3      | H9/S.Jacinto_3              |                    | 40°40'36.19"N; 8°43'13.53"W |
| Bom Sucesso, Foz do Arelho (Quartau, Seabra & Penado)              | H37                |                     |                             |                    | 39°25'2.95"N; 9°13'39.18"W  |
| Bom Sucesso, Foz do Arelho (Quartau, Seabra & Penado)              | H36                |                     |                             |                    | 39°25'2.95"N; 9°13'39.18"W  |
| Bom Sucesso, Foz do Arelho (Rodrigues, Marabuto, Pereira & Seabra) | H29/ F. Arelho_8   | H10/ F. Arelho_8    | H9/ F. Arelho_8             |                    | 39°25'2.95"N; 9°13'39.18"W  |
| Covão da Ametade, Serra da Estrela (Seabra)                        | H29                |                     |                             |                    | 40°19'33.85"N; 7°34'19.08"W |
| Santa Combadão, Serra da Estrela (Marabuto)                        | H29/S.Estrela_3    | H3/S.Estrela_3      | H9/S.Estrela_3              |                    | 40°23'51.71"N; 8°7'49.97"W  |
| Olival, Ourém (Quartau)                                            | H29                |                     |                             |                    | 39°42'38.51"N; 8°36'4.39"W  |
| Olival, Ourém (Quartau)                                            | H37/ Olival_6      | H9/ Olival_6        | H9/ Olival_6                |                    | 39°42'38.51"N; 8°36'4.39"W  |
| Évora de Alcobaça, Alcobaça (Nunes)                                | H37                |                     |                             |                    | 39°30'55.84"N; 8°58'20.40"W |
| Évora de Alcobaça, Alcobaça (Nunes)                                | H29/ Alcobaça_3    | Alcobaça_3          | Alcobaça_3                  |                    | 39°30'55.84"N; 8°58'20.40"W |
| Évora de Alcobaça, Alcobaça (Nunes)                                | H37/ Alcobaça_4    | H3/ Alcobaça_4      | H9/ Alcobaça_4              |                    | 39°30'55.84"N; 8°58'20.40"W |
| Évora de Alcobaça, Alcobaça (Nunes)                                | H29                |                     |                             |                    | 39°30'55.84"N; 8°58'20.40"W |
| Serra d' Aire (Seabra)                                             | H21/S.Aire_5       | H4/S.Aire_5         | H9/S.Aire_5                 |                    | 39°31'56.98"N; 8°31'52.56"W |
| Serra d' Aire (Seabra)                                             | H37                |                     |                             |                    | 39°31'56.98"N; 8°31'52.56"W |
| Serra Montejunto (Marabuto)                                        | H29/Montejunto_2   | H3/Montejunto_2     | H9/Montejunto_2             |                    | 39°10'24.53"N; 9°2'55.66"W  |
| Gouveia, Sintra (Quartau, Seabra & Penado)                         | H36                |                     |                             |                    | 38°50'15.75"N; 9°25'20.77"W |
| Fontanelas, Sintra (Rodrigues, Seabra & Pereira)                   | H29/ Sintra_10     | H3/ Sintra_10       | H9/ Sintra_10               | Sintra_10          | 38°50'15.75"N; 9°25'20.77"W |
| Arrábida, Setúbal (Fonseca)                                        | H29                |                     |                             | Arrabida_5         | 38°28'20.09"N; 8°59'41.77"W |
| Arrábida, Setúbal (Fonseca)                                        | H37/Arrabida_6     | H8/Arrabida_6       | H6/Arrabida_6               |                    | 38°28'20.09"N; 8°59'41.77"W |
| Vale do Gaio, Torrão, Alentejo (Seabra)                            | H37                |                     |                             |                    | 38°14'57.66"N; 8°17'49.32"W |
| Grândola, Alentejo (Seabra)                                        | H29                |                     |                             |                    | 38°10'5.83"N; 8°36'34.40"W  |
| Grândola, Alentejo (Seabra)                                        | H22                |                     |                             |                    | 38°10'5.83"N; 8°36'34.40"W  |
| Grândola, Alentejo (Quartau & Seabra)                              | H38/Grandola_1     | H8/Grandola_1       | H6/Grandola_1               |                    | 38°10'5.83"N; 8°36'34.40"W  |
| Grândola, Alentejo (Quartau & Seabra)                              | H26                |                     |                             |                    | 38°10'5.83"N; 8°36'34.40"W  |
| Beringel, Ferreira do Alentejo (Quartau & Simões)                  | H29/F.Alentejo_1   | H3/F.Alentejo_1     | H4/F.Alentejo_1             |                    | 38°3'23.09"N; 7°59'5.45"W   |
| Beja, Alentejo (Marabuto)                                          | H37                |                     |                             |                    | 38°5'22.11"N; 7°58'26.53"W  |
| Sines, Alentejo (Rodrigues & Marabuto)                             | H29/Sines_1        | H3/Sines_1          | H4/Sines_1                  |                    | 37°57'58.98"N; 8°52'25.14"W |
| Cercal, Alentejo (Seabra)                                          | H40                |                     |                             |                    | 37°46'39.12"N; 8°39'46.80"W |
| Ribeira do Torgal, Odemira, Alentejo (Ribeiro & Pires)             | H20                |                     |                             |                    | 37°39'35.14"N; 8°37'40.86"W |
| Ribeira do Torgal, Odemira, Alentejo (Ribeiro & Pires)             | H29                |                     |                             |                    | 37°39'35.14"N; 8°37'40.86"W |
| Ribeira do Torgal, Odemira, Alentejo (Ribeiro & Pires)             | H29                |                     |                             |                    | 37°39'35.14"N; 8°37'40.86"W |
| Santa Clara a Velha, Rio Mira, Alentejo (Ribeiro)                  | H40/R.Mira_1       | H8/R.Mira_1         | H8/R.Mira_1                 |                    | 37°30'38.22"N; 8°28'27.23"W |
| Santa Clara a Velha, Rio Mira, Alentejo (Ribeiro)                  | H39/Mira_1         | H8/Mira_1           | H6/Mira_1                   |                    | 37°30'38.22"N; 8°28'27.23"W |
| Santa Clara a Velha, Rio Mira, Alentejo (Ribeiro)                  | H40/Mira_2         | H8/Mira_2           | H7/Mira_2                   |                    | 37°30'38.22"N; 8°28'27.23"W |
| Santa Clara a Velha, Rio Mira, Alentejo (Rodrigues & Marabuto)     | H29/Mira_3         | H3/Mira_3           | H4/Mira_3                   |                    | 37°30'38.22"N; 8°28'27.23"W |
| Santa Clara a Velha, Rio Mira, Alentejo (Rodrigues & Marabuto)     | H37                | H8                  | H5                          |                    | 37°30'38.22"N; 8°28'27.23"W |
| Aljezur, Alentejo (Rodrigues & Marabuto)                           | H41/Aljejur_9.1    | H8/Aljejur_9.1      | H7/Aljejur_9.1              |                    | 37°18'11.22"N; 8°47'59.88"W |
| Silves, Algarve (Seabra)                                           | H29                |                     |                             |                    | 37°11'40.31"N; 8°27'55.28"W |
| Silves, Algarve (Seabra)                                           | H29                |                     |                             |                    | 37°11'40.31"N; 8°27'55.28"W |

| Location (Collector)                 | COI Haplotype    | COII Haplotype   | Cyt b Haplotype  | EF code  | GPS Coordinates              |
|--------------------------------------|------------------|------------------|------------------|----------|------------------------------|
| <b>Portugal</b>                      |                  |                  |                  |          |                              |
| Silves, Algarve (Seabra)             | H29/Silves_3     | H3/Silves_3      | Silves_3         |          | 37°11'40.31"N; 8°27'55.28"W  |
| Silves, Algarve (Seabra)             | H29              |                  |                  |          | 37°11'40.31"N; 8°27'55.28"W  |
| Silves, Algarve (Seabra)             | H29              |                  |                  |          | 37°11'40.31"N; 8°27'55.28"W  |
| Silves, Algarve (Seabra)             | H29              |                  |                  |          | 37°11'40.31"N; 8°27'55.28"W  |
| Barranco do Velho, Algarve (Quartau) | H29              |                  |                  |          | 37° 8'15.13"N; 8° 1'24.27"W  |
| São Miguel, Açores (Borges)          | H24/ Azores_1    | H3/ Azores_1     | H13/ Azores_1    | Azores_1 | 37°47'46.86"N; 25°11'4.50"W  |
| São Miguel, Açores (Borges)          | H24              |                  |                  |          | 37°47'46.86"N; 25°11'4.50"W  |
| São Miguel, Açores (Borges)          | H71              |                  |                  |          | 37°47'46.86"N; 25°11'4.50"W  |
| São Miguel, Açores (Borges)          | H24              |                  |                  |          | 37°47'46.86"N; 25°11'4.50"W  |
| São Miguel, Açores (Borges)          | H24              |                  |                  |          | 37°47'46.86"N; 25°11'4.50"W  |
| <b>Finland</b>                       |                  |                  |                  |          |                              |
| Tvarminne (Halkka)                   | H2/ Tvarminne_4  | H2/ Tvarminne_4  | H1/ Tvarminne_4  |          | 59°50'37.60"N; 23°14'21.68"E |
| Tvarminne (Halkka)                   | H16              |                  |                  |          | 59°50'37.60"N; 23°14'21.68"E |
| Tvarminne (Halkka)                   | H16              |                  |                  |          | 59°50'37.60"N; 23°14'21.68"E |
| Norra Grisselgrundet (Halkka)        | Grisselgrundet_4 | Grisselgrundet_4 | Grisselgrundet_4 |          | 59°50'17.48"N; 23°14'46.87"E |
| Norra Grisselgrundet (Halkka)        | H16              |                  |                  |          | 59°50'17.48"N; 23°14'46.87"E |
| Windskar (Halkka)                    | H2               |                  |                  |          | 59°49'40.56"N; 23°12'42.74"E |
| Brannskar (Halkka)                   | H5/ Brannskar_7  | H2/ Brannskar_7  | H3/ Brannskar_7  |          | 59°50'39.51"N; 23°16'22.50"E |
| Brannskar (Halkka)                   | H15              |                  |                  |          | 59°50'39.51"N; 23°16'22.50"E |
| Brannskar (Halkka)                   | H15              |                  |                  |          | 59°50'39.51"N; 23°16'22.50"E |
| Brannskar (Halkka)                   | H16              |                  |                  |          | 59°50'39.51"N; 23°16'22.50"E |
| Segelskar (Halkka)                   | H8/ Segelskar_4  | H2/ Segelskar_4  | H3/ Segelskar_4  |          | 59°45'52.22"N; 23°22'24.53"E |
| Segelskar (Halkka)                   | H16              |                  |                  |          | 59°45'52.22"N; 23°22'24.53"E |
| Punkalaidun (Halkka)                 | H1               |                  |                  |          | 61° 7'0.75"N; 23° 5'35.54"E  |
| Punkalaidun (Halkka)                 | H4               |                  |                  |          | 61° 7'0.75"N; 23° 5'35.54"E  |
| Punkalaidun (Halkka)                 | H7               |                  |                  |          | 61° 7'0.75"N; 23° 5'35.54"E  |
| Punkalaidun (Halkka)                 | H12              |                  |                  |          | 61° 7'0.75"N; 23° 5'35.54"E  |
| Haaparnaki-Keuruu (Halkka)           | H4               |                  |                  |          | 62°15'32.75"N; 24°42'28.08"E |
| Haaparnaki-Keuruu (Halkka)           | H7               |                  |                  |          | 62°15'32.75"N; 24°42'28.08"E |
| <b>Turkey</b>                        |                  |                  |                  |          |                              |
| Cerkes (Yurtserver)                  | Cerkes_3         | H1/ Cerkes_3     | H2/ Cerkes_3     |          | 40°48'59.24"N; 32°54'9.50"E  |
| Cerkes (Yurtserver)                  | H4               |                  |                  |          | 40°48'59.24"N; 32°54'9.50"E  |
| Cerkes (Yurtserver)                  | H6               |                  |                  |          | 40°48'59.24"N; 32°54'9.50"E  |
| Cerkes (Yurtserver)                  | H6               |                  |                  |          | 40°48'59.24"N; 32°54'9.50"E  |
| Cerkes (Yurtserver)                  | H11              |                  |                  |          | 40°48'59.24"N; 32°54'9.50"E  |
| Cerkes (Yurtserver)                  | H14              |                  |                  | Turkey_3 | 40°48'59.24"N; 32°54'9.50"E  |
| Cerkes (Yurtserver)                  | H14              |                  |                  |          | 40°48'59.24"N; 32°54'9.50"E  |
| Azdavay (Yurtserver)                 | H57/Azdavay_1    | H11/Azdavay_1    | H16/Azdavay_1    |          | 41°38'29.26"N; 33°17'52.54"E |
| Keçan (North) (Yurtserver)           | H57/ Keçan_N1    | H13/Keçan_N1     | H17/Keçan_N1     | Keçan_N1 | 40°53'29.60"N; 26°38'42.81"E |
| Keçan (North) (Yurtserver)           | H64              |                  |                  |          | 40°53'29.60"N; 26°38'42.81"E |
| Keçan (South) (Yurtserver)           | H57/Keçan_S1     | H12/Keçan_S1     | H16/Keçan_S1     |          | 40°44'41.83"N; 26°36'6.98"E  |
| Keçan (South) (Yurtserver)           | H64              |                  |                  |          | 40°44'41.83"N; 26°36'6.98"E  |
| Lapseki (Yurtserver)                 | H46/ Lapseki_1   | H12/ Lapseki_1   | H16/ Lapseki_1   |          | 40°19'3.46"N; 26°43'46.86"E  |
| Lapseki (Yurtserver)                 | H57              |                  |                  |          | 40°19'3.46"N; 26°43'46.86"E  |
| Lapseki (Yurtserver)                 | H59              |                  |                  |          | 40°19'3.46"N; 26°43'46.86"E  |
| Kucukuyu (Yurtserver)                | H55/ Kucukuyu_1  | H12/ Kucukuyu_1  | H16/ Kucukuyu_1  |          | 39°36'35.48"N; 26°33'2.11"E  |
| Kucukuyu (Yurtserver)                | H57              |                  |                  |          | 39°36'35.48"N; 26°33'2.11"E  |
| Kucukuyu (Yurtserver)                | H67              |                  |                  |          | 39°36'35.48"N; 26°33'2.11"E  |
| Suloglu (Yurtserver)                 | H57/ Suloglu_1   | H14/ Suloglu_1   | H16/ Suloglu_1   |          | 41°46'52.25"N; 26°53'1.74"E  |

| Location (Collector)                           | COI Haplotype    | COII Haplotype   | Cyt <i>b</i> Haplotype | EF code  | GPS Coordinates               |
|------------------------------------------------|------------------|------------------|------------------------|----------|-------------------------------|
| <b>Turkey</b>                                  |                  |                  |                        |          |                               |
| Suloglu (Yurtserver)                           | H57              |                  |                        |          | 41°46'52.25"N; 26°53'1.74"E   |
| Suloglu (Yurtserver)                           | H62              |                  |                        |          | 41°46'52.25"N; 26°53'1.74"E   |
| Pabucdere (Yurtserver)                         | H50/ Pabucdere_1 | H14/ Pabucdere_1 | H16/ Pabucdere_1       |          | 41°38'18.49"N; 27°54'54.61"E  |
| Pabucdere (Yurtserver)                         | H57              |                  |                        |          | 41°38'18.49"N; 27°54'54.61"E  |
| Pabucdere (Yurtserver)                         | H64              |                  |                        |          | 41°38'18.49"N; 27°54'54.61"E  |
| Demirkoy (Yurtserver)                          | H54/ Demirkoy_1  | H12/ Demirkoy_1  | H18/ Demirkoy_1        |          | 41°52'34.74"N; 27°46'8.04"E   |
| Demirkoy (Yurtserver)                          | H57              |                  |                        |          | 41°52'34.74"N; 27°46'8.04"E   |
| <b>Italy</b>                                   |                  |                  |                        |          |                               |
| Tardaria, Etna, Sicily (d'Urso)                |                  |                  | H4                     |          | 37°43'53.05"N; 14°59'8.12"E   |
| Tardaria, Etna, Sicily (d'Urso)                | H29              |                  |                        |          | 37°43'53.05"N; 14°59'8.12"E   |
| Bosco di Acisantantonio, Etna, Sicily (d'Urso) | H49/Sicily_5     | H12/Sicily_5     | Sicily_5               |          | 37°41'16.21"N; 15° 9'30.01"E  |
| Torcello, Veneze (Quartau)                     | H47              |                  |                        |          | 45°29'47.21"N; 12°25'11.44"E  |
| Via Appia, Rome (Quartau)                      | H53              |                  |                        |          | 41°44'33.26"N; 12°42'44.66"E  |
| Emilia, Parma (Quartau)                        | H32              |                  |                        |          | 44°48'12.33"N; 10°20'45.45"E  |
| Emilia, Parma (Quartau)                        | H32              |                  |                        |          | 44°48'12.33"N; 10°20'45.45"E  |
| Emilia, Parma (Quartau)                        | H32              |                  |                        |          | 44°48'12.33"N; 10°20'45.45"E  |
| Emilia, Parma (Quartau)                        | H32              |                  |                        |          | 44°48'12.33"N; 10°20'45.45"E  |
| Emilia, Parma (Quartau)                        | H32              |                  |                        |          | 44°48'12.33"N; 10°20'45.45"E  |
| Emilia, Parma (Quartau)                        | H32              |                  |                        | Italia_2 | 44°48'12.33"N; 10°20'45.45"E  |
| Emilia, Parma (Quartau)                        | H33              |                  |                        |          | 44°48'12.33"N; 10°20'45.45"E  |
| Emilia, Parma (Quartau)                        | H51              |                  |                        |          | 44°48'12.33"N; 10°20'45.45"E  |
| Florence, Toscana (Marabuto)                   | H49              |                  |                        |          | 43°49'21.87"N; 11°21'9.66"E   |
| Mt. Calvi, Toscana (Marabuto)                  | H53              |                  |                        |          | 43° 5'9.00"N; 10°36'28.00"E   |
| Greve in Chianti, Toscana (Marabuto)           | H49              |                  |                        |          | 43°35'2.00"N; 11°18'50.00"E   |
| Bologna (Marabuto)                             | H52              |                  |                        |          | 44° 2'45.00"N; 11°17'44.00"E  |
| Villaromagnana, Alps (Lessio)                  | H32              |                  |                        |          | 44°50'59.56"N; 8°53'25.52"E   |
| <b>United Kingdom</b>                          |                  |                  |                        |          |                               |
| Cardiff, Wales (Wilson)                        | H24              |                  |                        |          | 51°28'57.16"N; 3°11'0.41"W    |
| Cardiff, Wales (Wilson)                        | H24              |                  |                        | UK_7     | 51°28'57.16"N; 3°11'0.41"W    |
| Aberdare, Wales (Wilson)                       | H13              |                  |                        |          | 51°42'49.13"N; 3°26'43.27"W   |
| Aberdare, Wales (Wilson)                       | H13              |                  |                        |          | 51°42'49.13"N; 3°26'43.27"W   |
| Aberdare, Wales (Wilson)                       | H13              |                  |                        |          | 51°42'49.13"N; 3°26'43.27"W   |
| Aberdare, Wales (Wilson)                       | H24              |                  |                        |          | 51°42'49.13"N; 3°26'43.27"W   |
| Cambridge, England (Borges)                    | H23/Cambridge_1  | H3/Cambridge_1   | H12/Cambridge_1        |          | 52°12'22.80"N; 0° 7'29.41"E   |
| Cambridge, England (Borges)                    | H23/Cambridge_2  | H3/Cambridge_2   | H12/Cambridge_2        |          | 52°12'22.80"N; 0° 7'29.41"E   |
| Cambridge, England (Borges)                    | H24              |                  |                        |          | 52°12'22.80"N; 0° 7'29.41"E   |
| Oxfordshire, England (Corlev)                  | H24              |                  |                        |          | 51°39'30.43"N; 1°35'5.11"W    |
| <b>Canada</b>                                  |                  |                  |                        |          |                               |
| Burnaby Mt. British Columbia (Beckenbach)      | H24              |                  |                        |          | 53°43'36.00"N; 127°38'51.43"W |
| Burnaby Mt. British Columbia (Beckenbach)      | H24/Canada_3     | H3/Canada_3      | H12/Canada_3           |          | 53°43'36.00"N; 127°38'51.43"W |
| Burnaby Mt. British Columbia (Beckenbach)      | H70              |                  |                        |          | 53°43'36.00"N; 127°38'51.43"W |
| Burnaby Mt. British Columbia (Beckenbach)      | Canada_5         | Canada_5         | Canada_5               |          | 53°43'36.00"N; 127°38'51.43"W |
| <b>United States of America</b>                |                  |                  |                        |          |                               |
| Michigan (Fonseca)                             | H25              |                  |                        | USA_2    | 44°18'49.13"N; 85°35'6.26"W   |
| Michigan (Fonseca)                             | H25              |                  |                        |          | 44°18'49.13"N; 85°35'6.26"W   |
| Michigan (Fonseca)                             | H25/USA_4        | H5/USA_4         | H4/USA_4               |          | 44°18'49.13"N; 85°35'6.26"W   |
| Michigan (Fonseca)                             | H25              |                  |                        |          | 44°18'49.13"N; 85°35'6.26"W   |
| Michigan (Fonseca)                             | H26/USA_6        | H3/USA_6         | H11/USA_6              |          | 44°18'49.13"N; 85°35'6.26"W   |
| Wonalancet – New Hampshire (Thompson)          | H1               |                  |                        |          | 43°53'58.93"N; 71°21'33.47"W  |
| Wonalancet – New Hampshire (Thompson)          | H3               |                  |                        |          | 43°53'58.93"N; 71°21'33.47"W  |

| Location (Collector)                                                                | COI Haplotype  | COII Haplotype | Cyt b Haplotype | EF code     | GPS Coordinates              |
|-------------------------------------------------------------------------------------|----------------|----------------|-----------------|-------------|------------------------------|
| <b>United States of America</b>                                                     |                |                |                 |             |                              |
| Wonalancet – New Hampshire (Thompson)                                               | H9             |                |                 |             | 43°53'58.93"N; 71°21'33.47"W |
| Wonalancet – New Hampshire (Thompson)                                               | H10            |                |                 |             | 43°53'58.93"N; 71°21'33.47"W |
| <b>Spain</b>                                                                        |                |                |                 |             |                              |
| C. R. Fauna et Ed. Amb. "Los Hornos" (Rodrigues, Silva, Marabuto, Nunes & Ferreira) | H30            |                |                 |             | 39°26'14.10"N; 6°17'17.46"W  |
| Valdenoches, Castille La Mancha (Rodrigues, Silva, Marabuto, Nunes & Ferreira)      | H56/Spain_3.1  | H12/Spain_3.1  | H15/Spain_3.1   |             | 40°41'11.03"N; 3° 5'18.87"W  |
| Caspe, Aragon (Rodrigues, Silva, Marabuto, Nunes & Ferreira)                        | H56/Spain_4.1  | H12/Spain_4.1  | H15/Spain_4.1   |             | 41°21'41.30"N; 0° 6'17.83"W  |
| Tolva, Aragon (Rodrigues, Silva, Marabuto, Nunes & Ferreira)                        | H26            |                |                 |             | 42° 6'42.89"N; 42° 6'42.89"E |
| El Pont de Suert, Catalunha (Rodrigues, Silva, Marabuto, Nunes & Ferreira)          | H35            |                |                 |             | 42°24'46.98"N; 0°44'22.89"E  |
| Forgais de Montclús, Catalunha (Rodrigues, Silva, Marabuto, Nunes & Ferreira)       | H19            |                |                 |             | 41°43'42.20"N; 2°26'13.21"E  |
| Chert, Valencia (Rodrigues, Silva, Marabuto, Nunes & Ferreira)                      | H56            |                |                 |             | 40°30'55.36"N; 0° 8'27.38"E  |
| San Agustin, Aragon (Rodrigues, Silva, Marabuto, Nunes & Ferreira)                  | H56            |                |                 |             | 40° 8'24.18"N; 0°43'0.50"W   |
| Cheste, Valencia (Rodrigues, Silva, Marabuto, Nunes & Ferreira)                     | H56/Spain_22.1 | H12/Spain_22.1 | H15/Spain_22.1  |             | 39°31'9.33"N; 0°40'8.49"W    |
| Vélez-Rubio, Andalusia (Rodrigues, Silva, Marabuto, Nunes & Ferreira)               | H29            |                |                 |             | 37°38'49.42"N; 2° 5'13.65"W  |
| Ronda, Andalusia (Rodrigues, Silva, Marabuto, Nunes & Ferreira)                     | H29            |                |                 |             | 36°43'52.11"N; 5°10'55.79"W  |
| El Gastor, Andalusia (Rodrigues, Silva, Marabuto, Nunes & Ferreira)                 | H29            |                |                 |             | 36°50'16.20"N; 5°20'51.02"W  |
| Valdés, Asturias (Rodrigues, Silva & Nunes)                                         | H34/Spain_1    | H3/Spain_1     | H10/Spain_1     |             | 43°32'49.08"N; 6°31'28.92"W  |
| Meira, Galiza (Rodrigues, Silva & Nunes)                                            | H34/Spain_2    | H3/Spain_2     | H9/Spain_2      | Spain_2     | 43°13'44.40"N; 7°17'26.64"W  |
| Aracena, Anadalusia (Marabuto)                                                      | H42            |                |                 |             | 37°53'39.42"N; 6°33'43.16"W  |
| <b>France</b>                                                                       |                |                |                 |             |                              |
| Saint-Antonin-Noble-Val (Rodrigues, Silva, Marabuto, Nunes & Ferreira)              | H19            |                |                 |             | 44° 9'29.52"N; 1°43'16.45"E  |
| Lautrec (Rodrigues, Silva, Marabuto, Nunes & Ferreira)                              | H29            |                |                 |             | 43°42'47.14"N; 2° 7'6.04"E   |
| Fitou (Rodrigues, Silva, Marabuto, Nunes & Ferreira)                                | H19            |                |                 |             | 42°52'49.11"N; 2°59'34.12"E  |
| Aube, Lusigny-sur-Barse (Constant)                                                  | H17            |                |                 |             | 48°15'7.19"N; 4°16'7.76"E    |
| Aube, Lusigny-sur-Barse (Constant)                                                  | H29            |                |                 |             | 48°15'7.19"N; 4°16'7.76"E    |
| <b>Belgium</b>                                                                      |                |                |                 |             |                              |
| Namur (Constant)                                                                    | H16/ Belgium_1 | H2/ Belgium_1  | H2/ Belgium_1   | Belgium_1   | 50°27'55.51"N; 4°52'3.33"E   |
| Namur (Constant)                                                                    | H19            |                |                 |             | 50°27'55.51"N; 4°52'3.33"E   |
| Namur (Constant)                                                                    | H19            |                |                 |             | 50°27'55.51"N; 4°52'3.33"E   |
| Namur (Constant)                                                                    | H29            |                |                 | Belgium_4   | 50°27'55.51"N; 4°52'3.33"E   |
| <b>Morocco</b>                                                                      |                |                |                 |             |                              |
| Near Rabat (Rodrigues, Silva, Marabuto & Ferreira)                                  | H28            |                |                 |             | 33°46'37.56"N; 7°13'58.92"W  |
| Rabat (Rodrigues, Silva, Marabuto & Ferreira)                                       | H29            |                |                 |             | 34° 0'41.70"N; 6°42'32.94"W  |
| Rif (Rodrigues, Silva, Marabuto & Ferreira)                                         | H29            |                |                 | Morocco_6.1 | 35°51'58.14"N; 5°24'30.30"W  |
| Ifrane (Rodrigues, Silva, Marabuto & Ferreira)                                      | H37            |                |                 |             | 33°30'41.82"N; 5° 5'34.08"W  |
| Ifrane Centre (Rodrigues, Silva, Marabuto & Ferreira)                               | H37            |                |                 |             | 33°31'58.86"N; 5° 6'7.86"W   |
| Azrou (Rodrigues, Silva, Marabuto & Ferreira)                                       | H29            |                |                 |             | 33°26'57.78"N; 5°13'55.14"W  |
| Azrou (Rodrigues, Silva, Marabuto & Ferreira)                                       | H29            |                |                 |             | 33°29'39.48"N; 5°15'47.46"W  |
| <b>Greece</b>                                                                       |                |                |                 |             |                              |
| Bralou (Rodrigues, Silva, Marabuto)                                                 | H57            |                |                 |             | 38°44'35.70"N; 22°26'55.50"E |
| Iti National Park (Rodrigues, Silva, Marabuto)                                      | H63            |                |                 |             | 38°44'6.96"N; 22°22'10.20"E  |
| Mt Olympus (Rodrigues, Silva, Marabuto)                                             | H43            |                |                 |             | 40° 6'22.32"N; 22°27'33.66"E |
| Mt Olympus (Rodrigues, Silva, Marabuto)                                             | H68            |                |                 |             | 40° 5'35.94"N; 22°25'10.62"E |
| Mt Olympus (Rodrigues, Silva, Marabuto)                                             | H18            |                |                 |             | 40° 5'3.12"N; 22°24'25.26"E  |
| Meteora (Rodrigues, Silva, Marabuto)                                                | H57            |                |                 |             | 39°43'11.76"N; 21°38'14.28"E |
| Mt Vourinos (Rodrigues, Silva, Marabuto)                                            | H66            |                |                 |             | 40° 6'28.50"N; 21°40'21.78"E |
| Mt Vourinos (Rodrigues, Silva, Marabuto)                                            | H57            |                |                 |             | 40° 9'26.94"N; 21°43'36.36"E |
| Mt Vourinos (Rodrigues, Silva, Marabuto)                                            | H65            |                |                 |             | 40°12'1.68"N; 21°39'30.00"E  |
| Mt Giona (Rodrigues, Silva, Marabuto)                                               | H57            |                |                 |             | 38°40'29.40"N; 22°18'31.62"E |
| Mt Giona (Rodrigues, Silva, Marabuto)                                               | H44            |                |                 |             | 38°40'6.24"N; 22°18'31.62"E  |
| Mt Parnassus (Rodrigues, Silva, Marabuto)                                           | H57            |                |                 |             | 38°36'50.16"N; 22°34'33.00"E |

| Location (Collector)                      | COI Haplotype | COII Haplotype | Cyt <i>b</i> Haplotype | EF code    | GPS Coordinates              |
|-------------------------------------------|---------------|----------------|------------------------|------------|------------------------------|
| <b>Greece</b>                             |               |                |                        |            |                              |
| Mt Parnassus (Rodrigues, Silva, Marabuto) | H46           |                |                        |            | 38°34'42.24"N; 22°34'30.30"E |
| Mt Parnassus (Rodrigues, Silva, Marabuto) | H57           |                |                        |            | 38°37'23.94"N; 22°33'12.96"E |
| Mt Parnassus (Rodrigues, Silva, Marabuto) | H69           |                |                        |            | 38°33'19.98"N; 22°34'44.04"E |
| Mt Menalo (Rodrigues, Silva, Marabuto)    | H45           |                |                        |            | 37°37'50.64"N; 22°19'34.56"E |
| Mt Menalo (Rodrigues, Silva, Marabuto)    | H57           |                |                        |            | 37°38'26.10"N; 22°16'1.62"E  |
| Mt Menalo (Rodrigues, Silva, Marabuto)    | H60           |                |                        |            | 37°40'49.38"N; 22°13'46.26"E |
| Mt Menalo (Rodrigues, Silva, Marabuto)    | H58           |                |                        |            | 37°37'37.32"N; 22°17'39.18"E |
| Mt Taygetus (Rodrigues, Silva, Marabuto)  | H61           |                |                        |            | 36°53'20.10"N; 22°21'4.68"E  |
| Mt Parionas (Rodrigues, Silva, Marabuto)  | H57           |                |                        |            | 37°11'13.44"N; 22°33'30.96"E |
| <b>Slovenia</b>                           |               |                |                        |            |                              |
| Dragonja (Derlink)                        | H48           |                |                        | Slovenia_1 | 45°27'18.00"N; 13°42'4.68"E  |
| Dragonja (Derlink)                        | H48           |                |                        |            | 45°27'18.00"N; 13°42'4.68"E  |
| Gorice pri Famljah (Derlink)              | H48           |                |                        |            | 45°40'21.05"N; 14° 0'52.99"E |
| <b>Bulgaria</b>                           |               |                |                        |            |                              |
| Petrich (Paulo)                           | H57           |                |                        |            | 41°25'60.00"N; 23° 1'0.00"E  |
| <b>New Zealand</b>                        |               |                |                        |            |                              |
| Lincoln, South Island (Yurtserver)        | H14 FigS3     |                |                        |            | 43°38'40.41"S; 172°28'9.98"E |
| Lincoln, South Island (Yurtserver)        | H14 FigS3     |                |                        |            | 43°38'40.41"S; 172°28'9.98"E |
| Lincoln, South Island (Yurtserver)        | H14 FigS3     |                |                        |            | 43°38'40.41"S; 172°28'9.98"E |
