# Supplementary material for: New Mitochondrial and Nuclear Evidences Support Recent Demographic Expansion and an Atypical Phylogeographic Pattern in the Spittlebug Philaenus spumarius (Hemiptera, Aphrophoridae)
Source: PubMed Central journal article supplement (PMC4043774; doi:10.1371/journal.pone.0098375), 2014-06-03
Supplement: pone.0098375.s008.pdf [file pone.0098375.s008.pdf]

**Table S3.** Analyses of molecular variance (AMOVA) among regions of *P. spumarius* based on COI data.

| Source of variation                                                                     | d.f. | Sum of squares | Variance of components | % of variation |
|-----------------------------------------------------------------------------------------|------|----------------|------------------------|----------------|
| <i>*[North America][Azores][North Africa][Northern Europe] [Western Europe]</i>         |      |                |                        |                |
| <i>[South-western Europe][Central Europe][South-eastern Europe][South-western Asia]</i> |      |                |                        |                |
| Among groups                                                                            | 8    | 196.948        | 0.73116 Va             | 27.73          |
| Among regions within groups                                                             | 4    | 29.265         | 0.66613 Vb             | 25.26          |
| Within regions                                                                          | 177  | 219.194        | 1.23930 Vc             | <b>47.00</b>   |
| <b>Total</b>                                                                            | 189  | 445.568        | 2.63658                |                |
| <i>**[North America][Azores][North Africa][Northern Europe] [United Kingdom]</i>        |      |                |                        |                |
| <i>[Southern Europe][Central Europe][South-western Asia]</i>                            |      |                |                        |                |
| Among groups                                                                            | 7    | 155.904        | 0.77953 Va             | 27.59          |
| Among regions within groups                                                             | 5    | 70.309         | 0.80628 Vb             | 28.54          |
| Within regions                                                                          | 177  | 219.356        | 1.23930 Vc             | <b>43.87</b>   |
| <b>Total</b>                                                                            | 189  | 445.568        | 2.82511                |                |

*\* North America:* United States of America and Canada; *North Africa:* Morocco; *Northern Europe:* Finland; *Western Europe:* United Kingdom, France and Belgium; *South-western Europe:* Iberian Peninsula; *Central Europe:* Slovenia; *South-eastern Europe:* Italian Peninsula, Sicily and Balkans; *South-western Asia:* Anatolia Peninsula.

*\*\* North America:* United States of America and Canada; *North Africa:* Morocco; *Northern Europe:* Finland; *Southern Europe:* Iberian Peninsula, Italian Peninsula, Sicily and Balkans; *Central Europe:* Belgium, France and Slovenia; *South-western Asia:* Anatolia Peninsula.
