# Supplementary material for: New Mitochondrial and Nuclear Evidences Support Recent Demographic Expansion and an Atypical Phylogeographic Pattern in the Spittlebug Philaenus spumarius (Hemiptera, Aphrophoridae)
Source: PubMed Central journal article supplement (PMC4043774; doi:10.1371/journal.pone.0098375), 2014-06-03
Supplement: pone.0098375.s009.pdf [file pone.0098375.s009.pdf]

**Table S4.** Divergence time estimates in million years (Ma) from the most recent common ancestor of each main *Philaenus spumarius* mtDNA COI haplogroup estimated using a mean mutation rate of 3.54% per million years as suggested by [41].

|                                                | Lower 95%<br>HPD | Mean  | Upper 95%<br>HPD |
|------------------------------------------------|------------------|-------|------------------|
| Western-Mediterranean                          | 0.026            | 0.079 | 0.148            |
| Eastern-Mediterranean                          | 0.031            | 0.084 | 0.153            |
| Eastern                                        | 0.056            | 0.190 | 0.374            |
| Eastern vs western-Mediterranean               | 0.118            | 0.269 | 0.450            |
| Eastern vs eastern-Mediterranean               | 0.120            | 0.270 | 0.447            |
| Eastern-Mediterranean vs western-Mediterranean | 0.067            | 0.146 | 0.243            |
| Combined                                       | 0.122            | 0.270 | 0.448            |
